# Supplementary material for: Assembly and photocatalysis of two novel 3D Anderson-type polyoxometalate-based metal–organic frameworks constructed from isomeric bis(pyridylformyl)piperazine ligands
Source: Royal Society of Chemistry journal article supplement (doi:10.1039/c4dt01211a), 2014-01-01
Supplement: c4dt01211a1.pdf [file c4dt01211a1.pdf]

## Assembly and photocatalysis of two novel 3D Anderson-type polyoxometalate-based metal-organic frameworks constructed from isomeric bis(pyridylformyl)piperazine ligands

Xiuli Wang,<sup>\*a</sup> Zhihan Chang, Hongyan Lin, Aixiang Tian, Guocheng Liu, Juwen Zhang

Table S1. Selected bond distances (Å) and angles (°) for complexes 1 and 2.

| Complex 1        |            |                   |            |
|------------------|------------|-------------------|------------|
| Cu(1)–N(1)       | 2.010(10)  | Cu(1)–O(2)#1      | 2.021(7)   |
| Cu(1)–O(1)       | 1.937(6)   | Cu(1)–O(3)        | 2.278(7)   |
| Cu(1)–O(2)       | 1.973(6)   | Cu(1)–O(4)        | 2.441(6)   |
| O(1)–Cu(1)–O(2)  | 171.7(3)   | O(1)–Cu(1)–O(2)   | 89.2(3)    |
| O(1)–Cu(1)–N(1)  | 91.8(3)    | O(2)–Cu(1)–O(2)   | 83.1(3)    |
| O(2)–Cu(1)–N(1)  | 96.0(3)    | N(1)–Cu(1)–O(2)   | 178.9(3)   |
| O(1)–Cu(1)–O(3)  | 92.9(3)    | O(2)–Cu(1)–O(3)   | 89.8(3)    |
| N(1)–Cu(1)–O(3)  | 92.6(3)    | O(2)#2–Cu(1)–O(3) | 86.8(3)    |
| Complex 2        |            |                   |            |
| Cu(1)–N(1)       | 1.989(3)   | Cu(1)–O(3)        | 2.384(3)   |
| Cu(1)–O(1)       | 1.976(3)   | Cu(1)–O(1W)       | 1.981(3)   |
| Cu(1)–O(3)       | 2.384(3)   | Cu(1)–O(2W)       | 1.950(3)   |
| O(1W)–Cu(1)–N(1) | 91.71(12)  | N(1)–Cu(1)–O(3)   | 90.21(12)  |
| O(2W)–Cu(1)–O(1) | 85.84(13)  | O(1)–Cu(1)–N(1)   | 91.56(12)  |
| O(1W)–Cu(1)–O(3) | 85.83(11)  | O(2W)–Cu(1)–N(1)  | 161.76(14) |
| O(1)–Cu(1)–O(3)  | 87.43(11)  | O(1)–Cu(1)–O(1W)  | 172.52(12) |
| O(2W)–Cu(1)–O(3) | 107.67(12) | O(2W)–Cu(1)–O(1W) | 93.11(13)  |

Symmetry codes for 1: #1  $-x, -y+3, -z+1$ ;

### Figures

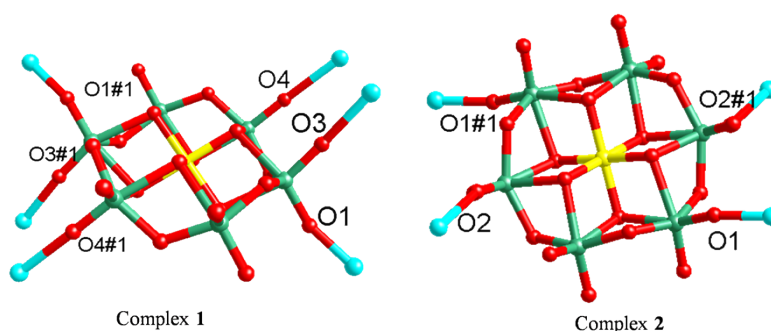

Fig. S1. The coordination modes in the title complexes. Symmetry codes for 1: #1  $1-x, -y+3, -z$ , for 2: #1  $1-x, -y, -z$

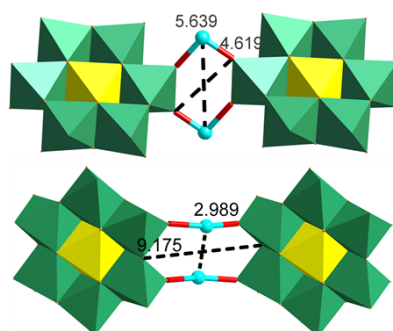

Fig. S2. Two kinds of the  $\text{Cu}_2(\text{POM})_2$  loops in complex **1**.

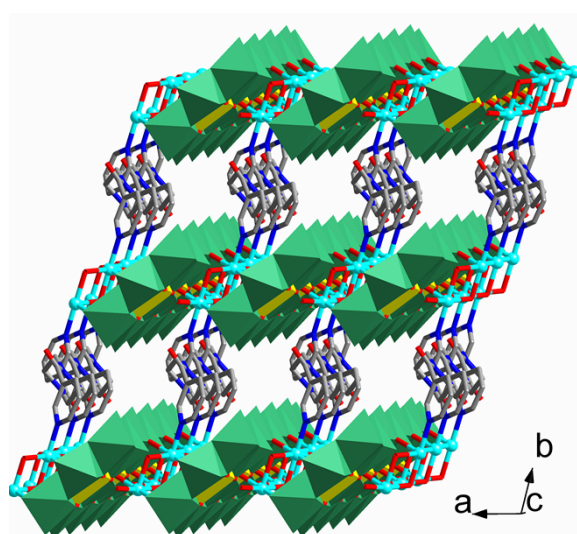

Fig. S3. The 3D framework of **1**.

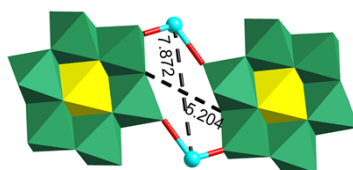

Fig. S4. The  $\text{Cu}_2(\text{POM})_2$  loop in **2**.

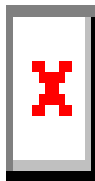

Fig. S5. The  $[\text{Cu}_2\text{L}^2_2]$  metal-organic loop in **2**.

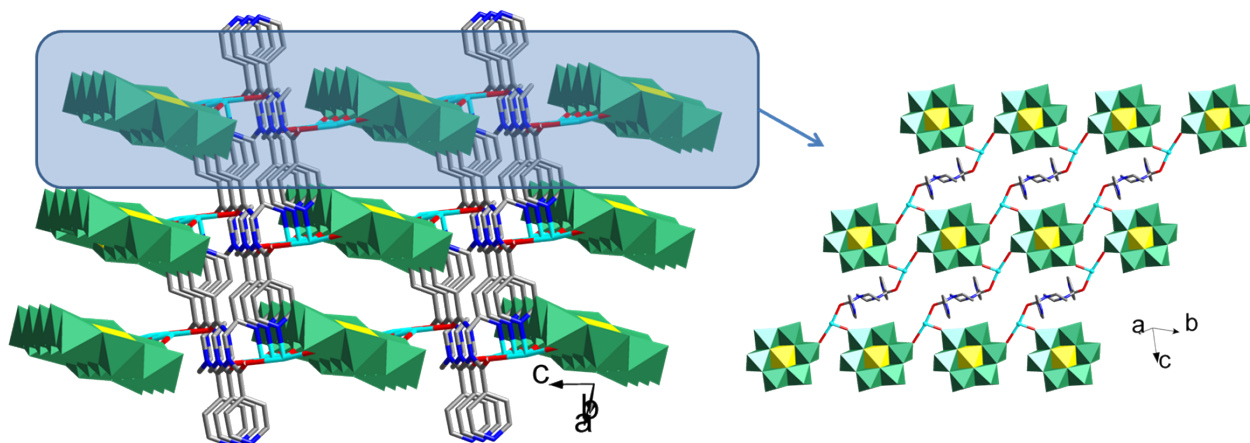

Fig. S6. The 3D framework of **2**.

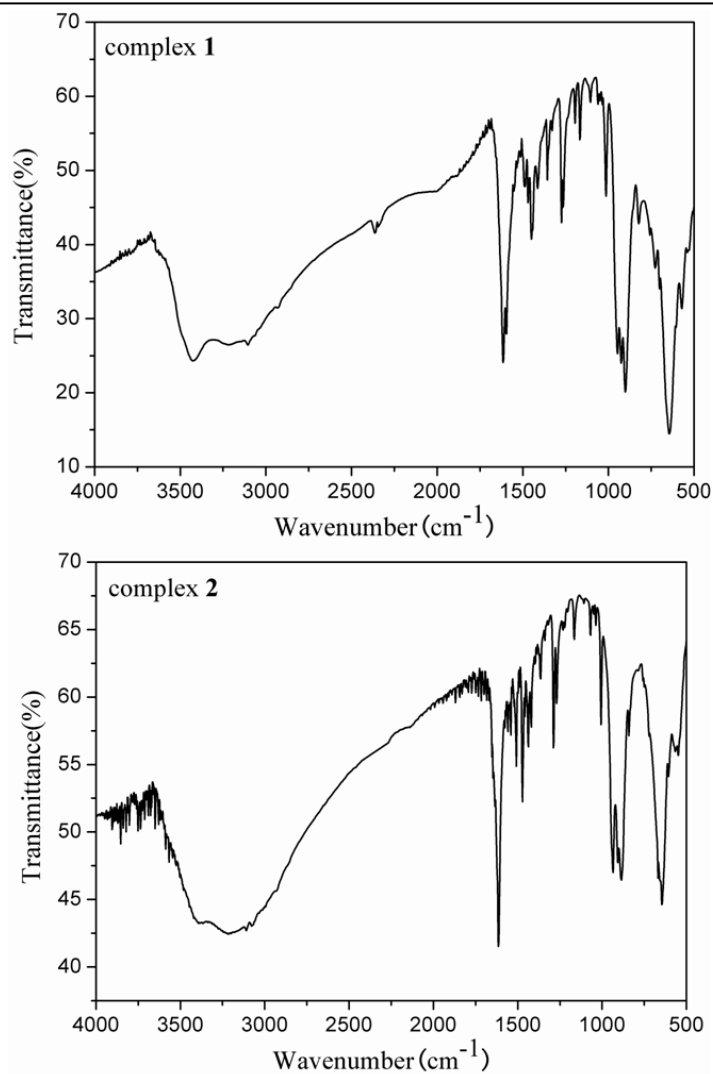

Fig. S7. The IR spectra of complexes 1 and 2.

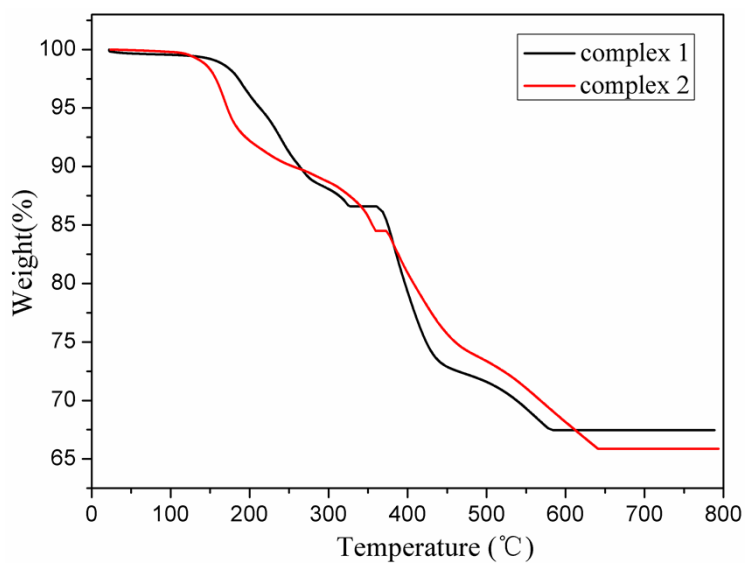

Fig. S8. The TGA curves of complexes 1 and 2.

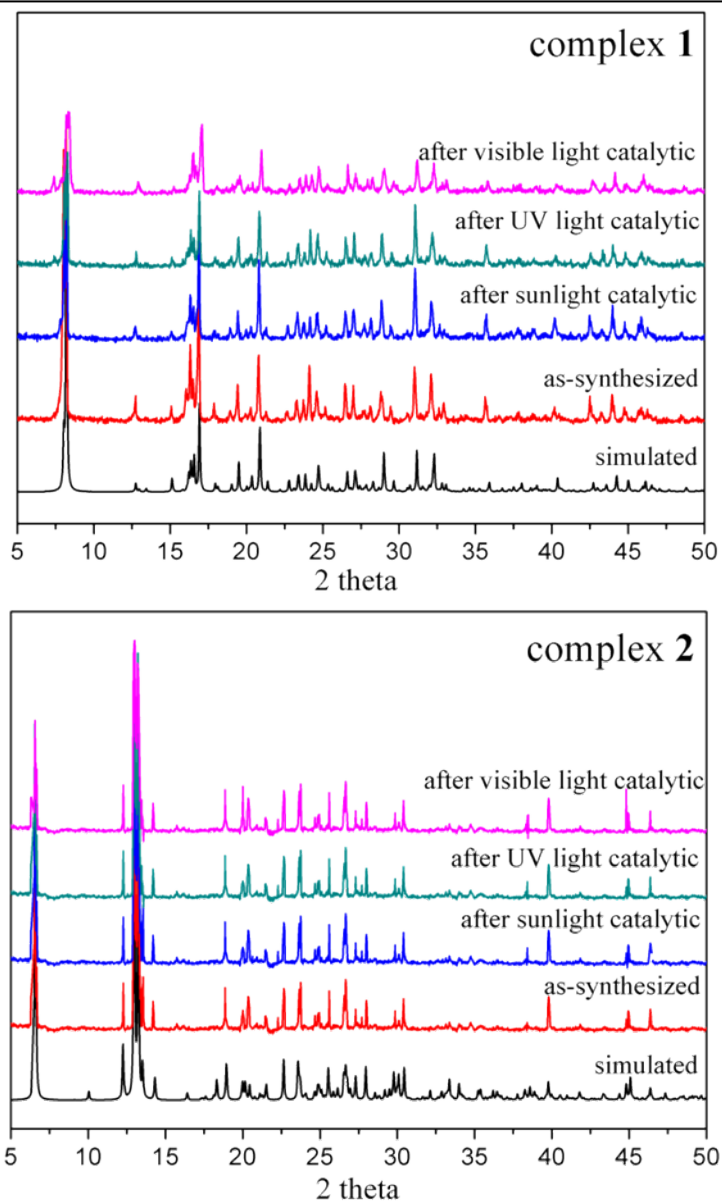

Fig. S9. Powder X-ray diffraction patterns of complexes 1 and 2.
